# Supplementary material for: Reduced Endoplasmic Reticulum Stress-Mediated Autophagy Is Required for Leptin Alleviating Inflammation in Adipose Tissue
Source: PubMed Central journal article supplement (PMC5715390; doi:10.3389/fimmu.2017.01507), 2017-11-08
Supplement: image_1.pdf [file image_1.pdf]

1 *Supplementary Material*

2 **Reduced ER stress-mediated autophagy is required for leptin**  
3 **alleviating inflammation in adipose tissue**

4 Lu Gan, Zhenjiang Liu, Dan Luo, Qian Ren, Hua Wu, Changxing Li, Chao Sun\*

5 \***Correspondence:** Corresponding Author: [sunchao2775@163.com](mailto:sunchao2775@163.com)  
6  
7  
8  
9  
10  
11  
12  
13  
14  
15  
16  
17  
18  
19  
20  
21  
22  
23  
24  
25  
26  
27  
28  
29  
30  
31  
32  
33  
34  
35  
36  
37  
38  
39  
40

41 1 Supplementary Figures and Tables

42 1. Supplementary Figures

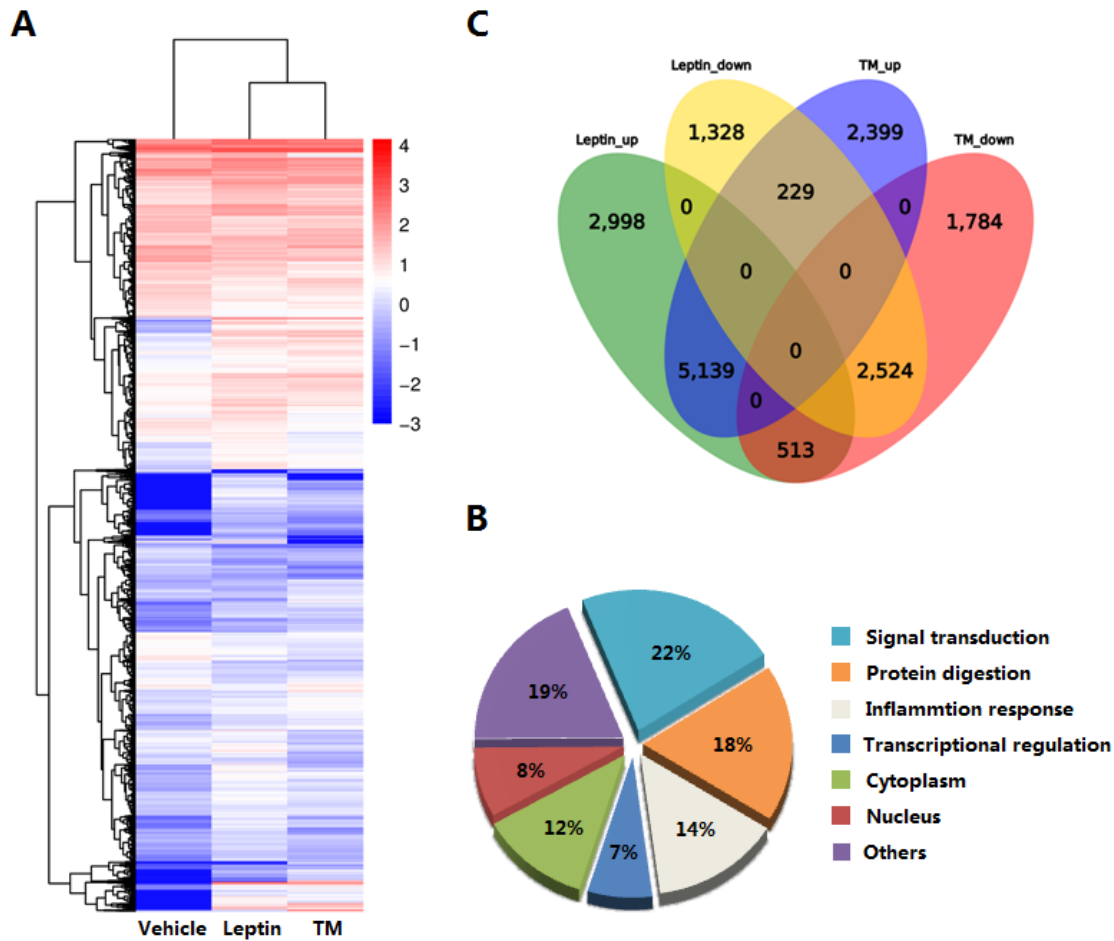

43  
 44 **Supplementary Figure 1. Leptin treatment produces a transcriptional signature distinct**  
 45 **from tunicamycin treatment in mice adipose** (A) Heatmap showing the genes significantly  
 46 up- or down-regulated in response to TM or leptin treatment (n=3). (B) Gene Ontology (GO)  
 47 analysis of the altered genes in Figure 2A, which shows the response of the biology processes  
 48 to TM or leptin treatment. The area of each pie slice represents the number of genes that belong  
 49 to the indicated GO terms (n=3). (C) Venn diagrams depicting the distinct and intersecting  
 50 nature of gene sets whose transcription is significantly regulated by treatment with TM or leptin  
 51 as compared to baseline vehicle control (n=3).

52  
 53  
 54  
 55  
 56  
 57  
 58  
 59

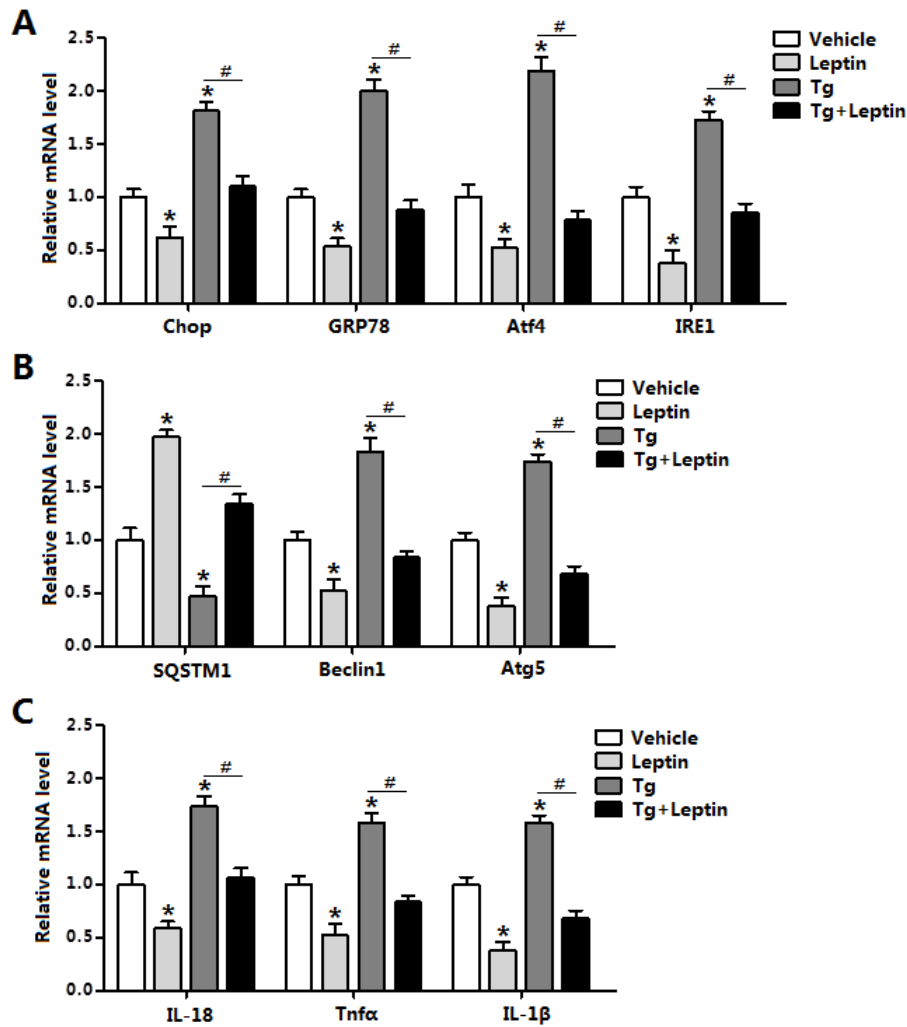

60

61 **Supplementary Figure 2. Leptin alleviated thapsigargin (Tg)-induced ER stress,**  
 62 **autophagy and inflammation in mice adipose tissue.** (A) Changes in the expression level of  
 63 genes associated with ER stress (n=3). (B) Changes in the expression level of genes associated  
 64 with autophagy (n=3). (C) Changes in the expression level of genes associated with  
 65 inflammation (n=3). Values are means  $\pm$  SEM. \*  $p < 0.05$  compared with the vehicle group, #  
 66  $p < 0.05$  compared with the Tg group.

67

68

69

70

71

72

73

74

75

76

77

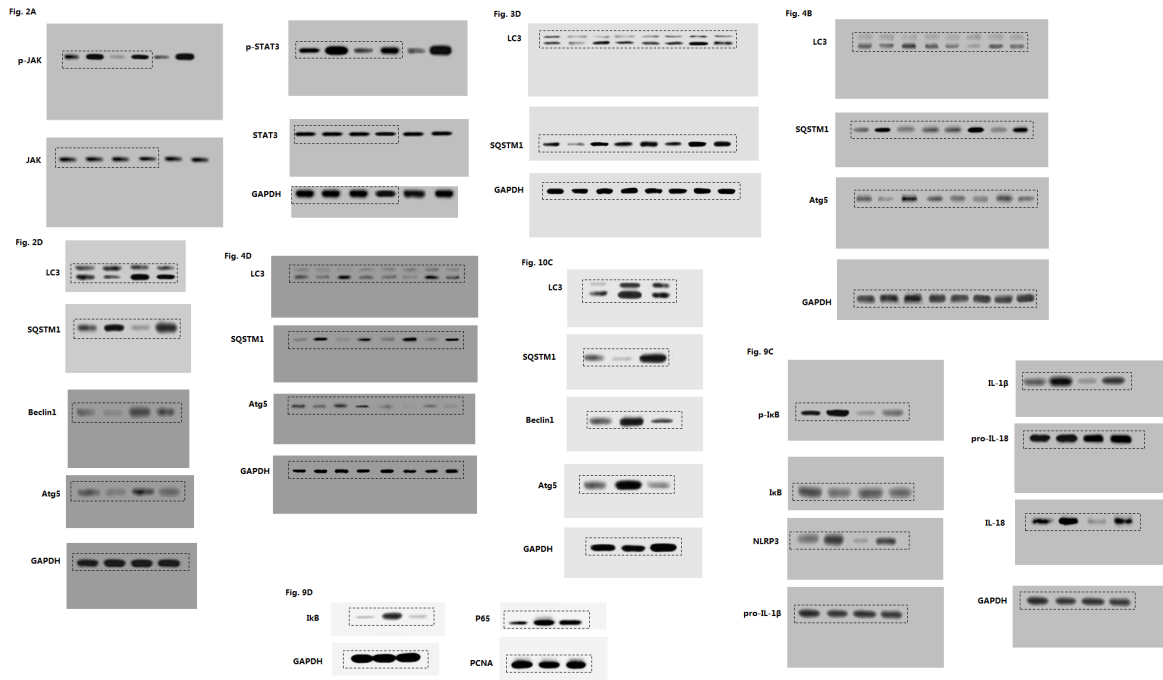

78

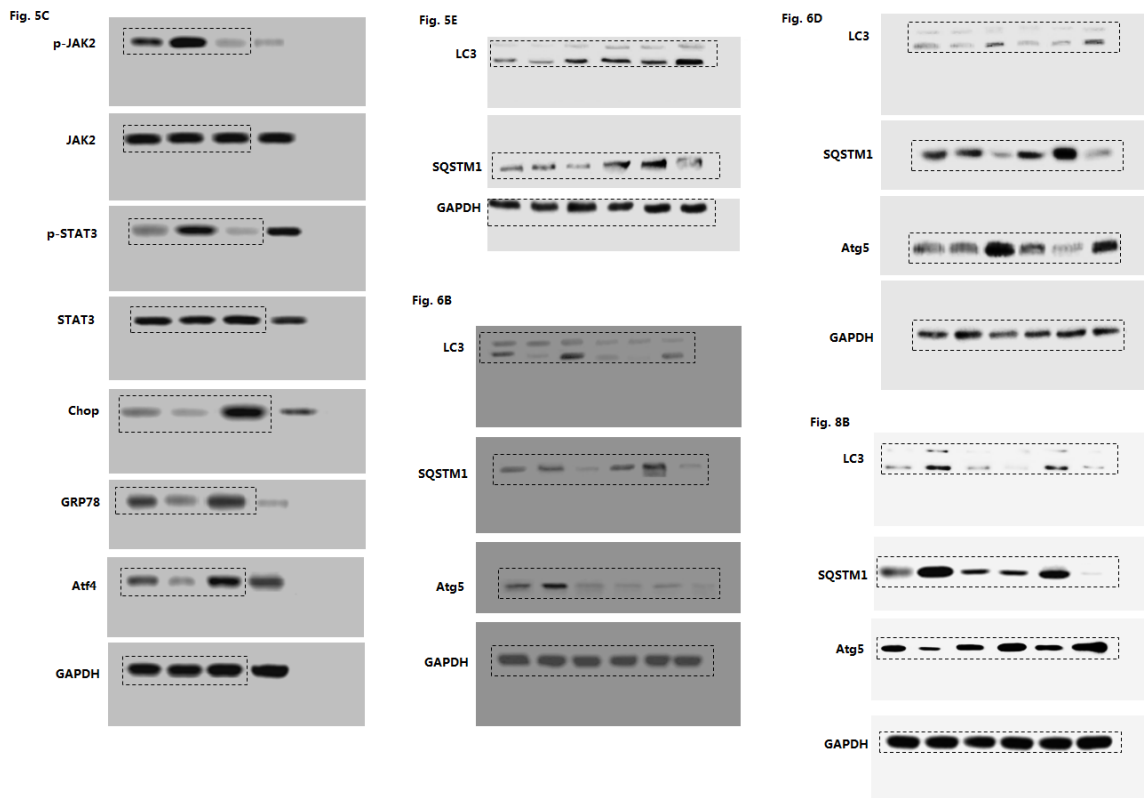

79

80 **Supplementary Figure 3.** The original full gels and blots related with the Figure 2-Figure 10.
